# Supplementary material for: Chicken miR-126-5p Negatively Regulates Antiviral Innate Immunity By Targeting TRAF3
Source: Research Square preprint supplement (doi:10.21203/rs.3.rs-655390/v1), 2021-07-01
Supplement: Supplementary file 1 [file fe01a3da77442b97b9d9bb4d.docx]

**Supplemental Information**


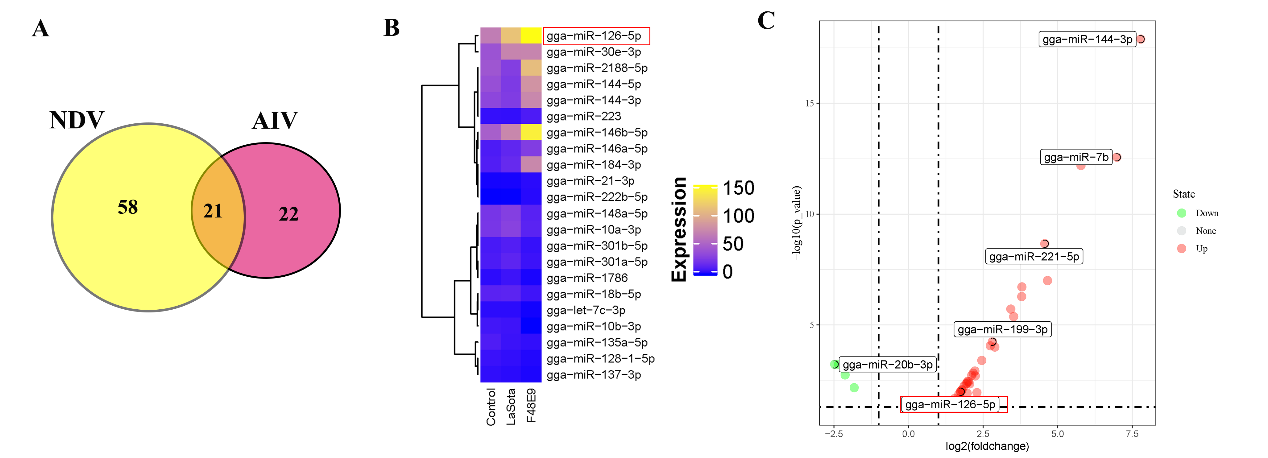


**Supplemental Figure.1** Analysis of differential miRNAs in chickens infected with Newcastle disease virus (NDV) or avian influenza virus (AIV). (A) The Vene Map different miRNAs of chicken infection NDV or AIV. (B) The Heat Map differential miRNAs of chicken infection with NDV. (C) The Volcano Map different miRNAs of chicken infection with AIV. The miRNA microarray using the R package “limma”. |logFC| >2 and a p-value <0.05 were set as the threshold to screen out the different miRNAs.

**Supplementary Table 1 Primer sequences**

| **Genes** | **Primer** | **Nucleotide sequence of primers (5’-3’)** |
| --- | --- | --- |
| qchIFNβ | Forward | TCCTACTGCTCTTGCTTCTGC |
| Reverse | TGGAAATGGAAAAGTCACGTC |
| qchPKR | Forward | TGCTTGACTGGAAAGGCTACT |
| Reverse | TCAGTCAAGAATAAACCATGTGTG |
| qchMX1 | Forward | GTTTCGGACATGGGGAGTAA |
| Reverse | GCATACGATTTCTTCAACTTTGG |
| qchIL-1β | Forward | GCTCTACATGTCGTGTGTGATGAG |
| Reverse | TGTCGATGTCCCGCATGA |
| qchIL-6 | Forward | AGGACGAGATGTGCAAGAAG |
| Reverse | TGCTGTAGCACAGAGACTCG |
| qchIL-8 | Forward | ATTCAAGATGTGAAGCTGAC |
| Reverse | AGGATCTGCAATTAACATGAGG |
| qchTRAF3 | Forward | CTGATTGTCAGTTTGAAGAGC |
| Reverse | ATGACACACGGGCAGTCTGT |
| qNDV-NP | Forward | TGCAGCAATGGTACTCCGTT |
| Reverse | CCTTTGCTACCGTGACCCAT |
| β-actin | Forward | CAGACATCAGGGTGTGATGG |
| Reverse | TCAGGGGCTACTCTCAGCTC |
